# Supplementary material for: Identification of ZBTB4 as an immunological biomarker that can inhibit the proliferation and invasion of pancreatic cancer
Source: Springer Nature journal article supplement (doi:10.1186/s12885-023-10749-x), 2023-03-22
Supplement: MOESM2 [file 12885_2023_10749_MOESM2_ESM.pdf]

Figure 7A:

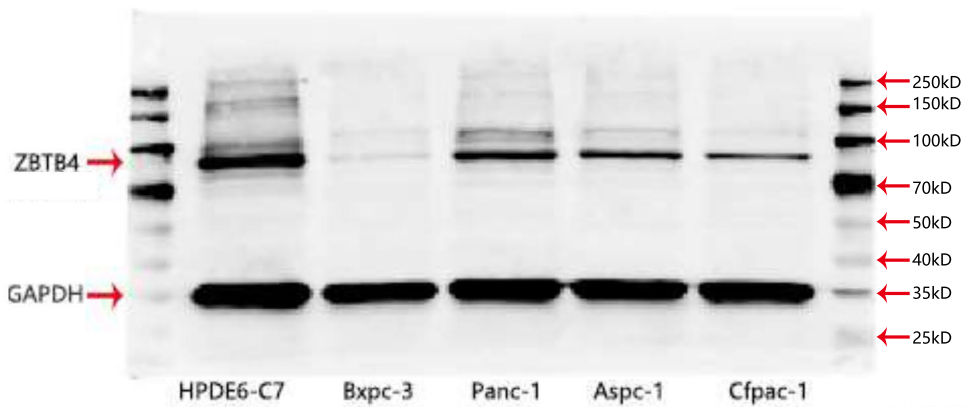

Figure 7D:

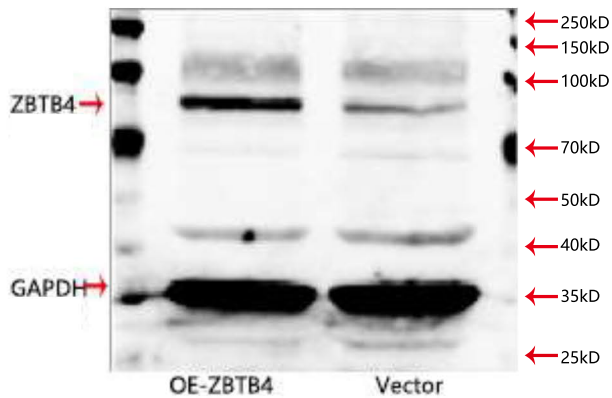

Figure 7G:

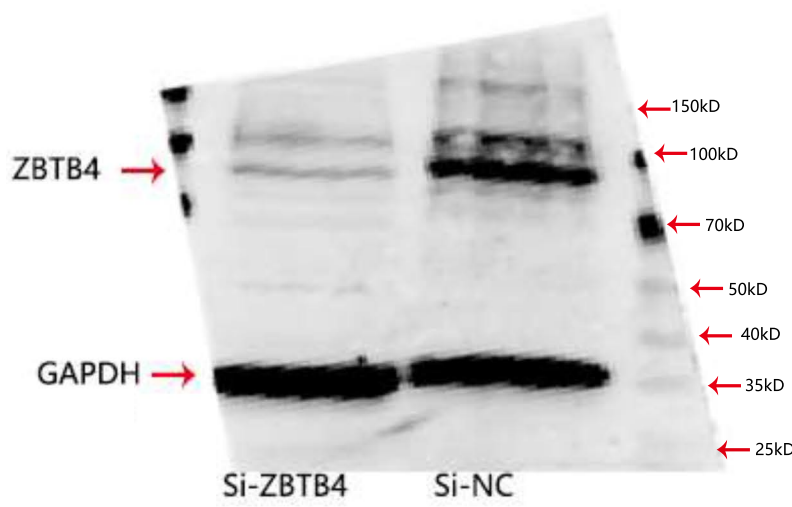

**Supplementary Figure S2.** Original image of intact gels/blots without cropping. The bands were visualized using the Odyssey Infrared Imaging System.
